# Supplementary material for: Understanding Nitrogen and Phosphorus Leaching from Compost Addition to Bioretention Media
Source: Atypon-hosted journal article supplement (doi:10.1061/jswbay.sweng-472), 2023-01-12
Supplement: supplemental_materials_jswbay.sweng-472_owen.pdf [file supplemental_materials_jswbay.sweng-472_owen.pdf]

## SUPPLEMENTAL MATERIALS

*ASCE Journal of Sustainable Water in the Built Environment*

# Understanding Nitrogen and Phosphorus Leaching from Compost Addition to Bioretention Media

Dylan C. Owen, Colleen Gardina, Travis K. Ostrom, and Allen P.  
Davis

**DOI:** 10.1061/JSWBAY.SWENG-472

© ASCE 2022

[www.ascelibrary.org](http://www.ascelibrary.org)

*Table S1: Media compositions in mesocosm columns. 30G = 30% green waste, 15G = 15% green waste, 15G+WTR = 15% green waste and WTR, 30B = 30% biosolids, 15B = 15% biosolids, 30WB = 30% washed biosolids, WTR = water treatment residual, and BSM = bioretention soil medium.*

| Column ID              | BSM | 30G            | 15G            | 15G +<br>WTR   | 30B       | 15B       | 30WB      |
|------------------------|-----|----------------|----------------|----------------|-----------|-----------|-----------|
| BSM % <sup>1</sup>     | 100 | 70             | 85             | 81.3           | 70        | 85        | 70        |
| Compost % <sup>1</sup> | 0   | 30             | 15             | 15             | 30        | 15        | 30        |
| Compost<br>Source      | N/A | green<br>waste | green<br>waste | green<br>waste | biosolids | biosolids | biosolids |
| WTR % <sup>1</sup>     | 0   | 0              | 0              | 3.8            | 0         | 0         | 0         |

<sup>1</sup> Percent by volume.

*Table S2: Composition of synthetic stormwater used in mesocosm column studies.*

| Component                   | Value         | Source (CAS)                   | Manufacturer    |
|-----------------------------|---------------|--------------------------------|-----------------|
| Nitrate, NO <sub>3</sub> -N | 1 mg/L as N   | NaNO <sub>3</sub> (7631-99-4)  | J.T. Baker      |
| Organic N                   | 2 mg/L as N   | Glycine (56-40-6)              | Alfa Aesar      |
| Phosphorus                  | 0.2 mg/L as P | Tap water                      | N/A             |
| Copper                      | 0.06 mg/L     | CuCl <sub>2</sub> (10125-13-0) | Acros Organics  |
| Zinc                        | 0.5 mg/L      | ZnCl <sub>2</sub> (7646-85-7)  | Fisher Chemical |
| Dissolved Solids            | 80 mg/L       | CaCl <sub>2</sub> (10043-52-4) | J.T. Baker      |
|                             | 100 mg/L      | NaCl (7647-14-5)               | Sigma-Aldrich   |
| Sodium Bisulfite            | 2.2 mg/L      | NaHSO <sub>3</sub> (7631-90-5) | J.T. Baker      |
| pH                          | ~7            | Tap water                      | N/A             |

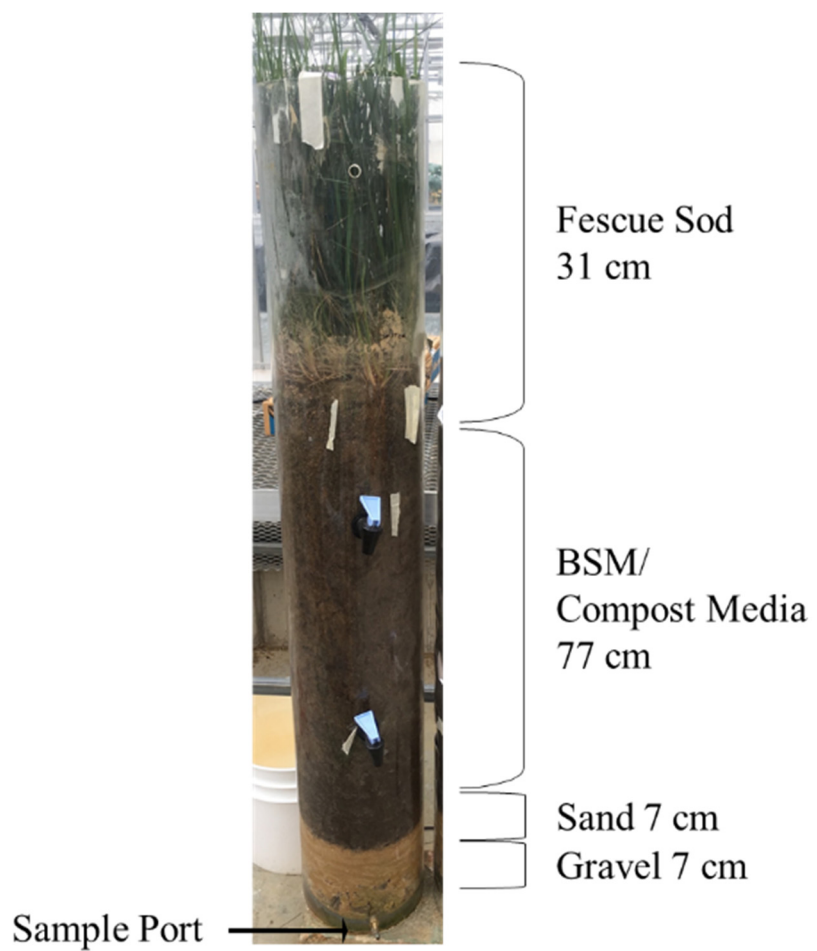

*Figure S1: Column setup.*
